# Supplementary material
Source: PubMed Central journal article supplement (PMC5778084)
Supplement: mmc1.pdf [file mmc1.pdf]

**Supplemental Data**

**Rare Coding Variants in *ANGPTL6* Are Associated  
with Familial Forms of Intracranial Aneurysm**

**Romain Bourcier, Solena Le Scouarnec, Stéphanie Bonnaud, Matilde Karakachoff, Emmanuelle Bourcereau, Sandrine Heurtebise-Chrétien, Céline Menguy, Christian Dina, Floriane Simonet, Alexis Moles, Cédric Lenoble, Pierre Lindenbaum, Stéphanie Chatel, Bertrand Isidor, Emmanuelle Génin, Jean-François Deleuze, Jean-Jacques Schott, Hervé Le Marec, ICAN Study Group, Gervaise Loirand, Hubert Desal, and Richard Redon**

## Supplemental Figure 1

Analysis of serum levels of ANGPTL6 in controls (WT-ANGPTL6) and individuals expressing the p.Glu131Val-ANGPTL6 (heterozygous).

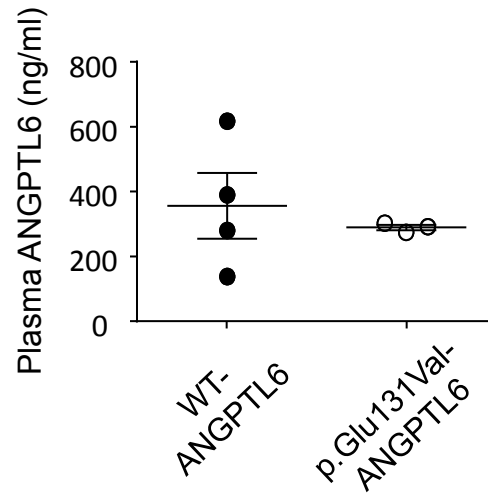

Supplemental Table 2: Association tests on rare coding variants in *ANGPTL6*

| Statistical test | Number of carriers |                   | Allele count |                        | p-value | OR    | CI 95%         |
|------------------|--------------------|-------------------|--------------|------------------------|---------|-------|----------------|
|                  | IA cases           | Internal controls | IA cases     | gnomAD NFE individuals |         |       |                |
| SKAT             | 6/95               | 8/404             | -            | -                      | 0.0233  | -     | -              |
| CAST             | 6/95               | 8/404             | -            | -                      | 0.0331  | 3.326 | [0.927-11.242] |
| FISHER           | -                  | -                 | 6/190        | 169/15018              | 0.0227  | 2.865 | [1.023-6.485]  |

Supplemental Table 3: Full list of rare coding variants \* detected in *ANGPTL6* among IA cases and reference individuals

| GRCh37/<br>hg19 position | rsID        | REF allele | ALT allele               | Protein Consequence<br>(ENSP00000253109) | Transcript Consequence<br>(ENST00000253109) | Annotation  | Allele Count in cases<br>(n=95) | Allele Count in<br>internal controls<br>(n=404) | Allele Count<br>(gnomAD NFE) | MAF<br>(gnomAD NFE) |
|--------------------------|-------------|------------|--------------------------|------------------------------------------|---------------------------------------------|-------------|---------------------------------|-------------------------------------------------|------------------------------|---------------------|
| 19:10203293              | .           | G          | C                        | p.Ala462Gly                              | c.1385C>G                                   | missense    | 0                               | 0                                               | 1                            | 6.68E-05            |
| 19:10203300              | rs769022609 | T          | A                        | p.Lys460Ter                              | c.1378A>T                                   | stop gained | 1                               | 0                                               | 0                            | -                   |
| 19:10203324              | rs200825170 | G          | A                        | p.Arg452Cys                              | c.1354C>T                                   | missense    | 0                               | 0                                               | 1                            | 6.68E-05            |
| 19:10203363              | rs201518909 | G          | A                        | p.Arg439Ter                              | c.1315C>T                                   | stop gained | 0                               | 0                                               | 2                            | 1.33E-04            |
| 19:10203375              | rs150235799 | C          | T                        | p.Gly435Ser                              | c.1303G>A                                   | missense    | 0                               | 0                                               | 1                            | 6.67E-05            |
| 19:10203390              | rs769478685 | C          | T                        | p.Gly430Ser                              | c.1288G>A                                   | missense    | 0                               | 0                                               | 1                            | 6.67E-05            |
| 19:10203416              | rs548381762 | T          | C                        | p.His421Arg                              | c.1262A>G                                   | missense    | 0                               | 0                                               | 1                            | 6.69E-05            |
| 19:10203432              | rs146282548 | C          | G                        | p.Gly416Arg                              | c.1246G>C                                   | missense    | 0                               | 1                                               | 9                            | 6.02E-04            |
| 19:10203434              | rs372960335 | C          | T                        | p.Arg415Gln                              | c.1244G>A                                   | missense    | 0                               | 1                                               | 1                            | 6.69E-05            |
| 19:10203435              | rs377498859 | G          | A                        | p.Arg415Trp                              | c.1243C>T                                   | missense    | 0                               | 0                                               | 1                            | 6.69E-05            |
| 19:10203444              | .           | G          | C                        | p.Leu412Val                              | c.1234C>G                                   | missense    | 0                               | 0                                               | 2                            | 1.34E-04            |
| 19:10204027              | rs776568403 | G          | T                        | p.Ser407Tyr                              | c.1220C>A                                   | missense    | 0                               | 0                                               | 1                            | 6.67E-05            |
| 19:10204052              | rs568396237 | C          | T                        | p.Val399Met                              | c.1195G>A                                   | missense    | 0                               | 0                                               | 1                            | 6.67E-05            |
| 19:10204083              | .           | AAGAG      | A                        | p.Ser387PhefsTer81                       | c.1160_1163delCTCT                          | frameshift  | 0                               | 0                                               | 1                            | 6.67E-05            |
| 19:10204132              | .           | T          | C                        | p.His372Arg                              | c.1115A>G                                   | missense    | 0                               | 0                                               | 1                            | 6.67E-05            |
| 19:10204137              | rs761235613 | G          | T                        | p.Ser370Arg                              | c.1110C>A                                   | missense    | 0                               | 0                                               | 1                            | 6.67E-05            |
| 19:10204142              | rs754265148 | C          | T                        | p.Glu369Lys                              | c.1105G>A                                   | missense    | 0                               | 0                                               | 1                            | 6.67E-05            |
| 19:10204187              | rs779222736 | C          | G                        | p.Gly354Arg                              | c.1060G>C                                   | missense    | 0                               | 0                                               | 3                            | 2.00E-04            |
| 19:10204205              | .           | G          | A                        | p.Leu348Phe                              | c.1042C>T                                   | missense    | 1                               | 0                                               | 0                            | -                   |
| 19:10204215              | rs769287477 | C          | G                        | p.Glu344Asp                              | c.1032G>C                                   | missense    | 0                               | 1                                               | 0                            | -                   |
| 19:10204229              | rs138652863 | G          | A                        | p.Arg340Cys                              | c.1018C>T                                   | missense    | 0                               | 0                                               | 3                            | 2.00E-04            |
| 19:10204239              | .           | C          | G                        | p.Gln336His                              | c.1008G>C                                   | missense    | 0                               | 0                                               | 1                            | 6.67E-05            |
| 19:10204377              | .           | G          | C                        | p.His315Asp                              | c.943C>G                                    | missense    | 0                               | 0                                               | 1                            | 6.66E-05            |
| 19:10204419              | rs748744561 | G          | A                        | p.Arg301Trp                              | c.901C>T                                    | missense    | 0                               | 0                                               | 2                            | 1.33E-04            |
| 19:10204440              | rs201494217 | C          | T                        | p.Gly294Arg                              | c.880G>A                                    | missense    | 0                               | 0                                               | 1                            | 6.66E-05            |
| 19:10204464              | rs774043154 | A          | G                        | p.Trp286Arg                              | c.856T>C                                    | missense    | 0                               | 0                                               | 2                            | 1.33E-04            |
| 19:10204469              | rs201622589 | G          | C                        | p.Ser284Ter                              | c.851C>G                                    | stop gained | 0                               | 0                                               | 24                           | 1.60E-03            |
| 19:10204476              | rs760163416 | C          | T                        | p.Val282Ile                              | c.844G>A                                    | missense    | 0                               | 0                                               | 1                            | 6.66E-05            |
| 19:10204510              | rs778164883 | C          | A                        | p.Gln270His                              | c.810G>T                                    | missense    | 0                               | 0                                               | 1                            | 6.67E-05            |
| 19:10204512              | rs372998779 | G          | C                        | p.Gln270Glu                              | c.808C>G                                    | missense    | 0                               | 0                                               | 3                            | 2.00E-04            |
| 19:10204529              | rs150117768 | C          | A                        | p.Arg264Leu                              | c.791G>T                                    | missense    | 0                               | 0                                               | 1                            | 6.67E-05            |
| 19:10204530              | rs182345321 | G          | A                        | p.Arg264Cys                              | c.790C>T                                    | missense    | 0                               | 0                                               | 5                            | 3.33E-04            |
| 19:10205491              | .           | C          | T                        | p.Glu236Lys                              | c.706G>A                                    | missense    | 0                               | 0                                               | 2                            | 1.33E-04            |
| 19:10205553              | rs138519545 | T          | C                        | p.Asp215Gly                              | c.644A>G                                    | missense    | 0                               | 0                                               | 1                            | 6.66E-05            |
| 19:10205607              | rs145558307 | G          | A                        | p.Pro197Leu                              | c.590C>T                                    | missense    | 0                               | 0                                               | 1                            | 6.67E-05            |
| 19:10206662              | rs200836122 | T          | C                        | p.Gln193Arg                              | c.578A>G                                    | missense    | 0                               | 0                                               | 13                           | 8.68E-04            |
| 19:10206680              | rs771739756 | C          | G                        | p.Gly187Ala                              | c.560G>C                                    | missense    | 0                               | 0                                               | 1                            | 6.72E-05            |
| 19:10206686              | .           | C          | A                        | p.Cys185Phe                              | c.554G>T                                    | missense    | 0                               | 0                                               | 1                            | 6.68E-05            |
| 19:10206729              | .           | C          | G                        | p.Val171Leu                              | c.511G>C                                    | missense    | 0                               | 1                                               | 0                            | -                   |
| 19:10206761              | rs771917209 | A          | C                        | p.Leu160Arg                              | c.479T>G                                    | missense    | 0                               | 0                                               | 1                            | 6.70E-05            |
| 19:10206763              | rs369847598 | C          | A                        | p.Gln159His                              | c.477G>T                                    | missense    | 0                               | 0                                               | 5                            | 3.35E-04            |
| 19:10206774              | rs770895499 | G          | A                        | p.Arg156Trp                              | c.466C>T                                    | missense    | 0                               | 0                                               | 1                            | 6.72E-05            |
| 19:10206780              | rs199549770 | C          | T                        | p.Ala154Thr                              | c.460G>A                                    | missense    | 0                               | 0                                               | 1                            | 6.72E-05            |
| 19:10206782              | rs770263825 | G          | GCGCGCTGAG<br>CCTCGGCGGA | p.Ala153ValfsTer66                       | c.439_457dupTCCGCC<br>GAGGCTCAGCGCG         | frameshift  | 2                               | 0                                               | 1                            | 6.72E-05            |
| 19:10206787              | rs776060868 | C          | CTGAGCCTCGG<br>CGGACGCGT | p.Ala153ValfsTer66                       | c.434_452dupACGCGT<br>CCGCCGAGGCTCA         | frameshift  | 0                               | 0                                               | 2                            | 1.34E-04            |
| 19:10206801              | rs779899913 | A          | G                        | p.Ser147Pro                              | c.439T>C                                    | missense    | 0                               | 0                                               | 1                            | 6.76E-05            |
| 19:10206824              | rs554909694 | A          | G                        | p.Leu139Pro                              | c.416T>C                                    | missense    | 0                               | 0                                               | 1                            | 6.82E-05            |
| 19:10206824              | rs554909694 | A          | T                        | p.Leu139His                              | c.416T>A                                    | missense    | 0                               | 0                                               | 1                            | 6.82E-05            |

|             |             |   |   |             |          |             |   |   |    |          |
|-------------|-------------|---|---|-------------|----------|-------------|---|---|----|----------|
| 19:10206848 | rs576667683 | T | A | p.Glu131Val | c.392A>T | missense    | 2 | 2 | 39 | 2.67E-03 |
| 19:10206854 | .           | C | G | p.Gly129Ala | c.386G>C | missense    | 0 | 1 | 0  | -        |
| 19:10206875 | .           | G | A | p.Ala122Val | c.365C>T | missense    | 0 | 0 | 1  | 6.92E-05 |
| 19:10206896 | .           | T | C | p.Gln115Arg | c.344A>G | missense    | 0 | 0 | 1  | 6.94E-05 |
| 19:10206915 | .           | G | A | p.Gln109Ter | c.325C>T | stop gained | 0 | 0 | 1  | 7.00E-05 |
| 19:10206993 | .           | C | A | p.Ala83Ser  | c.247G>T | missense    | 0 | 0 | 1  | 6.82E-05 |
| 19:10206995 | .           | A | T | p.Leu82Gln  | c.245T>A | missense    | 0 | 0 | 1  | 6.81E-05 |
| 19:10206997 | .           | C | G | p.Arg81Ser  | c.243G>C | missense    | 0 | 1 | 3  | 2.03E-04 |
| 19:10207001 | .           | T | C | p.Gln80Arg  | c.239A>G | missense    | 0 | 0 | 1  | 6.77E-05 |
| 19:10207020 | .           | C | G | p.Glu74Gln  | c.220G>C | missense    | 0 | 0 | 1  | 6.73E-05 |
| 19:10207035 | .           | C | T | p.Val69Ile  | c.205G>A | missense    | 0 | 0 | 3  | 2.05E-04 |
| 19:10207035 | .           | C | A | p.Val69Phe  | c.205G>T | missense    | 0 | 0 | 1  | 6.82E-05 |
| 19:10207053 | .           | C | G | p.Ala63Pro  | c.187G>C | missense    | 0 | 0 | 2  | 1.35E-04 |
| 19:10207059 | .           | C | T | p.Glu61Lys  | c.181G>A | missense    | 0 | 0 | 1  | 6.76E-05 |
| 19:10207076 | rs560311003 | T | G | p.Glu55Ala  | c.164A>C | missense    | 0 | 0 | 1  | 6.77E-05 |
| 19:10207083 | rs746538090 | T | A | p.Thr53Ser  | c.157A>T | missense    | 0 | 0 | 1  | 6.76E-05 |
| 19:10207103 | rs560892001 | C | T | p.Gly46Asp  | c.137G>A | missense    | 0 | 0 | 2  | 1.34E-04 |
| 19:10207104 | .           | C | T | p.Gly46Ser  | c.136G>A | missense    | 0 | 0 | 1  | 6.73E-05 |
| 19:10207225 | rs751565560 | C | T | p.Trp5Ter   | c.15G>A  | stop gained | 0 | 0 | 1  | 6.69E-05 |

\* Rare variants were defined as having an MAF below 1% among the whole-genome sequenced individuals with European Non-Finnish ancestry available in gnomAD
